# Supplementary material
Source: Springer Nature journal article supplement (https://www.springermedizin.de/resource/supplementary/12865_2014_581_MOESM2_ESM.pdf/9428282)
Supplement: MOESM2 [file 9428282]

### Plasma FFA

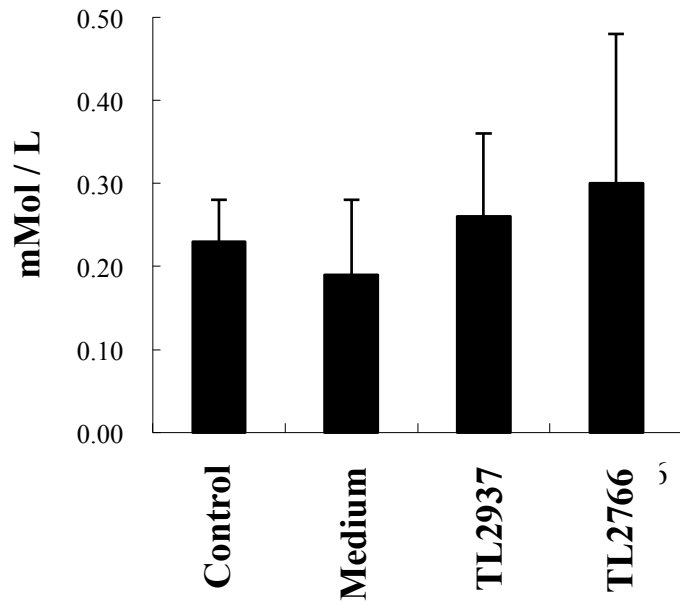

### Plasma Glucose

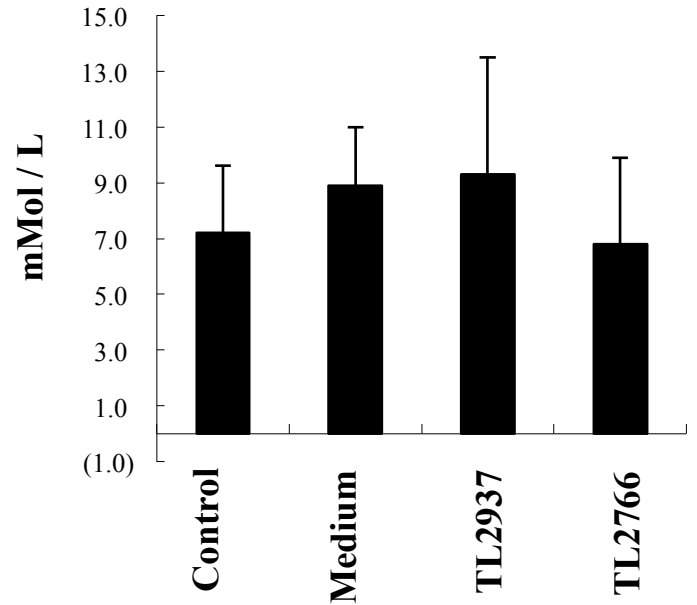

### Plasma TG

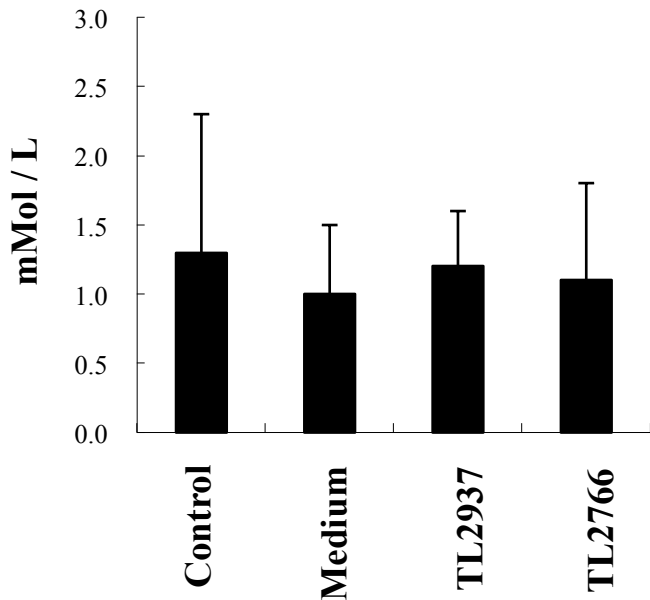

### Plasma TC

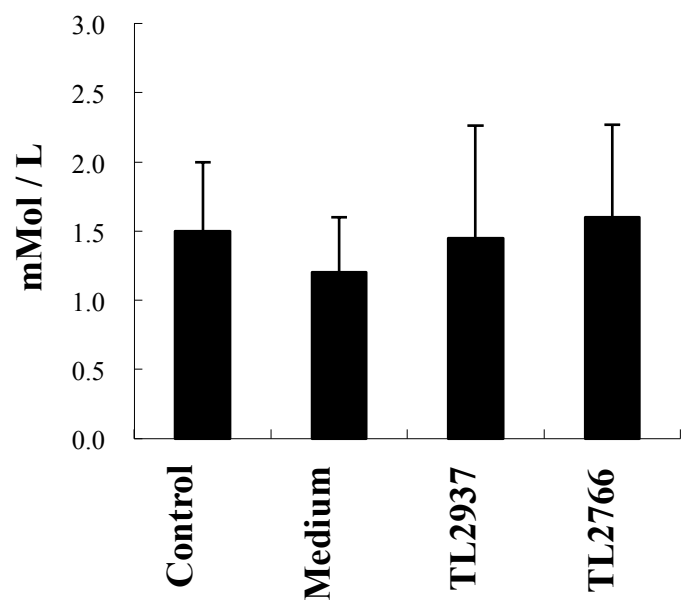

**Supplemental Figure 1.** Effect of *Lactobacillus jensenii* TL2937 on piglets' plasma biochemical markers. Pigs were grown from 3 weeks of age until week 24. Five pigs were used for each experimental group. The Control group was fed only the balanced conventional diet without antimicrobials *ad libitum*. The Medium, TL2937 and TL2766 groups were fed balanced conventional diet with supplemental bacteria medium only (200 g/day), *L. jensenii* TL2937 ( $3 \times 10^8$  cfu/g) or *L. plantanum* TL2766 ( $3 \times 10^8$  cfu/g) respectively, from 3 to 17 weeks of age. Plasma levels of Free Fatty Acid (FFA), glucose, total cholesterol (TC) and triglycerides (TG) were determined at the end of experiments. Values for bars with different letters were significantly different ( $P < 0.05$ ). Values for bars with shared letters do not differ significantly.
